# Supplementary material for: miR-376a-3p and miR-376b-3p overexpression in Hutchinson-Gilford progeria fibroblasts inhibits cell proliferation and induces premature senescence
Source: PubMed Central journal article supplement (PMC8800101; doi:10.1016/j.isci.2022.103757), 2022-01-10
Supplement: mmc1.pdf [file mmc1.pdf]

**Supplemental information**

**miR-376a-3p and miR-376b-3p overexpression  
in Hutchinson-Gilford progeria fibroblasts inhibits  
cell proliferation and induces premature senescence**

**Diane Frankel, Valérie Delecourt, Elva-María Novoa-del-Toro, Jérôme D. Robin, Coraline Airault, Catherine Bartoli, Aurélie Carabalona, Sophie Perrin, Kilian Mazaleyrat, Annachiara De Sandre-Giovannoli, Frederique Magdinier, Anaïs Baudot, Nicolas Lévy, Elise Kaspi, and Patrice Roll**

# Supplemental information

A

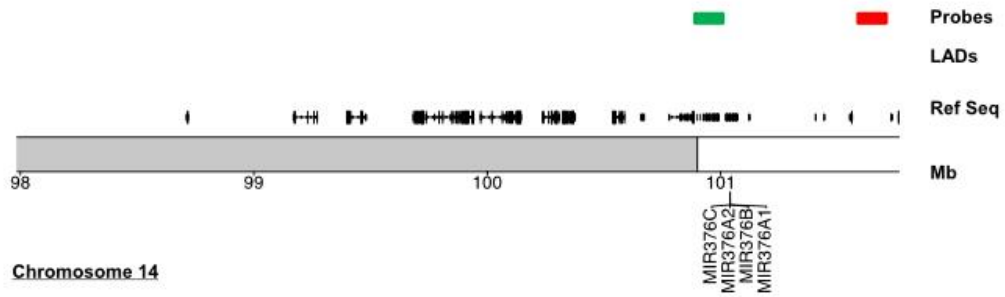

B

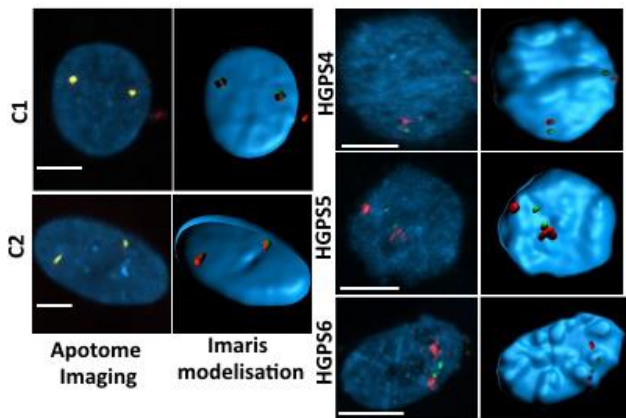

C

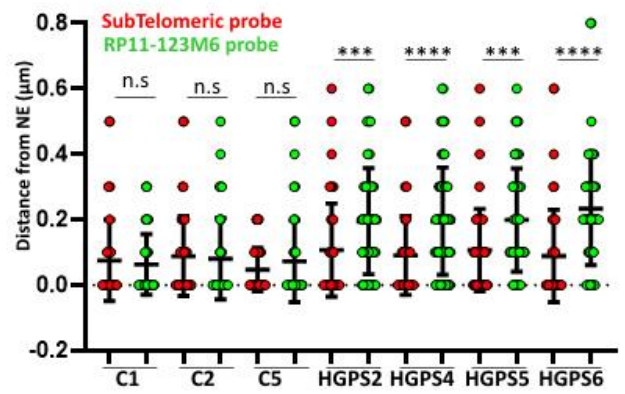

D

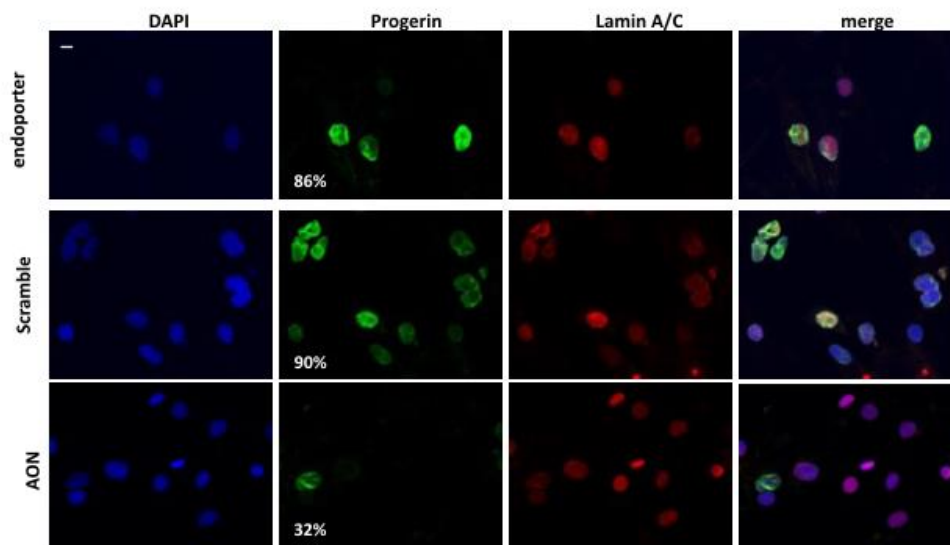

**Figure S1 related to figure 2: Epigenetic modifications relative to chromosome 14 in HGPS fibroblasts.**

**A:** Positioning of LAD and probes on chromosome 14. LADs were determined using two sets of data available : Lamin B1 (GSE63440; (Dou et al., 2015)); Lamin A (GSE54334; (Lund et al., 2014)). **B:** Representative images of 3D-FISH obtained with an apotome microscope (Carl Zeiss Microimaging, Jena, Germany) and processed with IMARIS for  $n \approx 30$  nuclei *per* sample. **C:** Distance between the probes and the nuclear envelope (NE) in control fibroblasts and HGPS fibroblasts (Mann Whitney test). **D:** Immunofluorescence images of HGPS5 fibroblasts, transfected with endopporter, scramble AON (scramble) or exon 10 and exon 11 AON of *LMNA* gene (AON), stained for progerin and lamin A/C and counterstained with DAPI. Scale bar, 10  $\mu$ m. Data are represented as mean  $\pm$  SEM. (\* $p < 0.05$ , \*\* $p < 0.01$ , \*\*\* $p < 0.001$  and \*\*\*\* $p < 0.0001$ ).

A

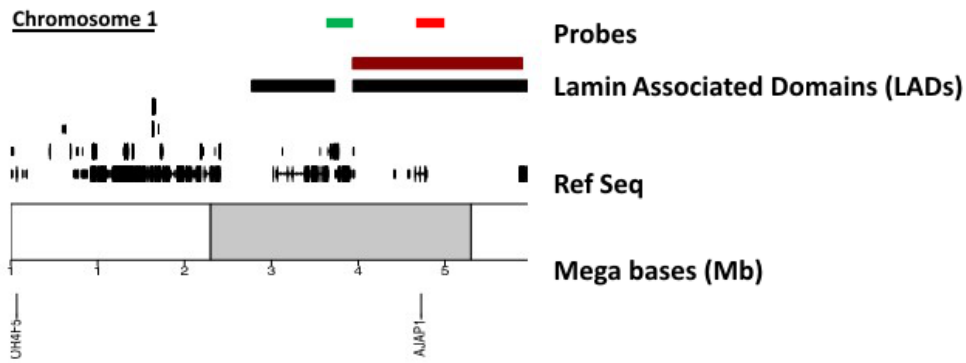

B

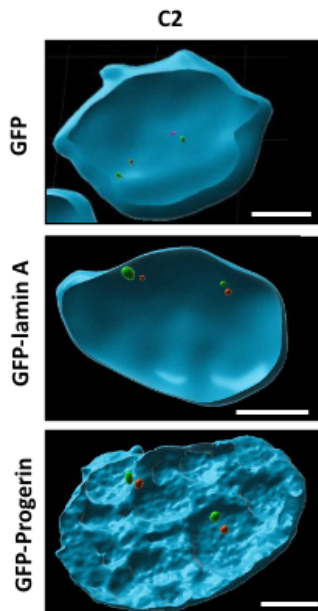

C

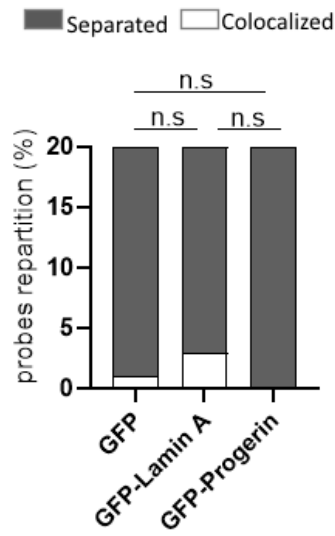

D

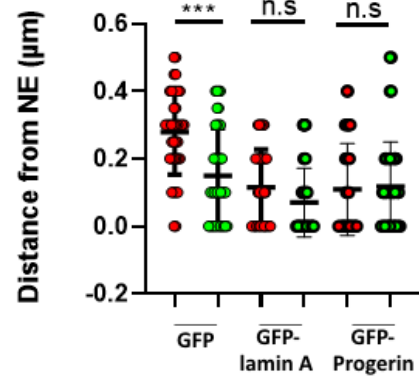

E

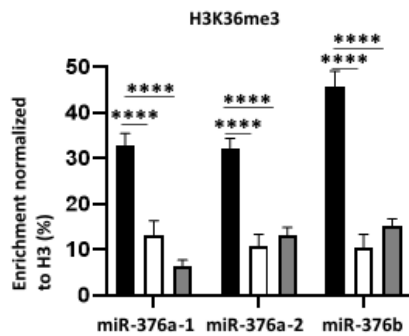

F

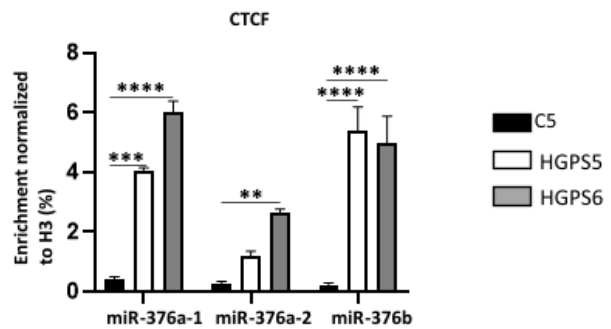

**Figure S2 related to figure 2: Epigenetic modifications.**

**A:** Positioning of LAD and probes on chromosome 1. LADs were determined using two sets of data available: Lamin B1 (GSE63440; (Dou et al., 2015)); Lamin A (GSE54334; (Lund et al., 2014)). Probes were designed, a subtelomeric LADs and separated from the same genetic distance as the 14q32 probes ( $\approx 1.4\text{Mb}$ ). **B:** Representative images of 3D-FISH of C2 fibroblasts transfected with a plasmid expressing only GFP (GFP), or GFP-wild-type lamin A (lamin A) GFP-progerin (progerin). Images were obtained with an apotome microscope (Carl Zeiss Microimaging, Jena, Germany) and processed with IMARIS for  $n\approx 10$  nuclei per sample. Scale bar,  $5\mu\text{m}$ . **C:** Percentage of separated and colocalized probes (Chi-square test). **D:** Distance between the 1p36 probes and the nuclear envelope (NE) (Mann-Whitney test). **E** and **F:** Enrichment of **(E)** H3K36me3 and **(F)** CTCF in C5, HGPS5 and HGPS6 fibroblasts on 3 different loci that belong to the 14q32 cluster (ANOVA test). Data are represented as mean  $\pm$  SEM. (\* $p<0.05$ , \*\* $p<0.01$ , \*\*\* $p<0.001$  and \*\*\*\* $p<0.0001$ ).

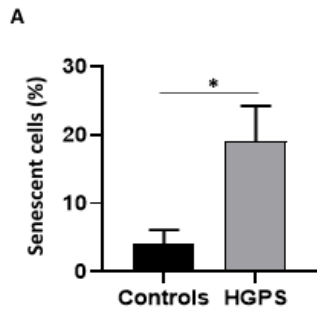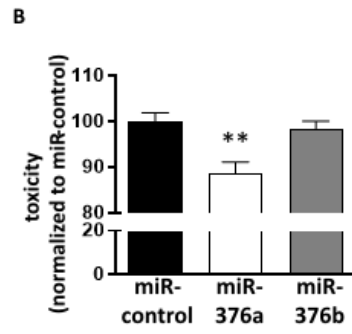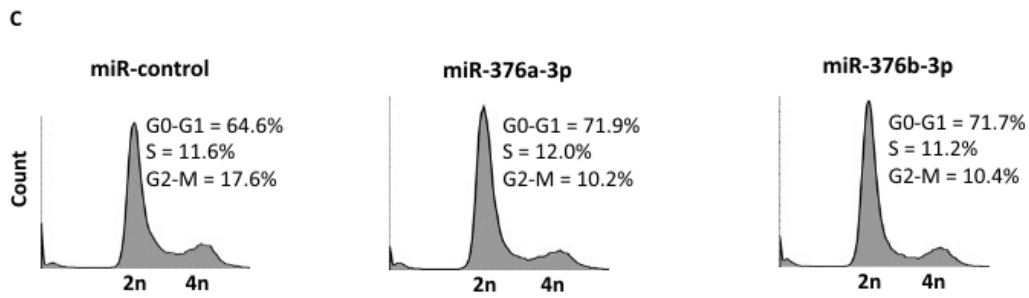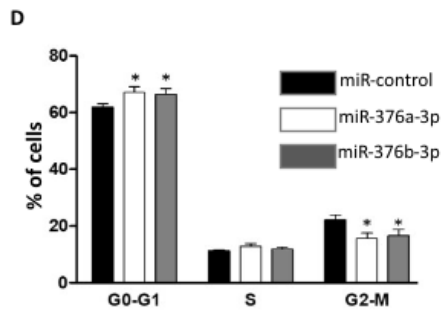

**E**

hsa-miR-376a-3p

5' **AUCAUAG**AGGAAAAUCCACGU 3'  
 |||||  
 5'-**AUAAGAU**AGGAAAAUCCACGU-3'

miR-376a-3p\_MUT

hsa-miR-376b-3p

5' **AUCAUAG**AGGAAAAUCCAUGUU 3'  
 |||||  
 5'-**AUAAGAU**AGGAAAAUCCAUGUU-3'

miR-376b-3p\_MUT

**Figure S3 related to figure 4: Basal senescent state in control and HGPS fibroblasts; effect of miR-376a-3p or miR-376b-3p overexpression on cell cycle in control fibroblasts.**

**A:** Percentage of senescent cells in control (n=4) and HGPS (n=3) fibroblasts (Mann Whitney test). **B:** Cell toxicity measured with Cell Tox® kit (Unpaired t-test, n=3). Results are normalized with control condition (miR-control). **C and D:** Cell cycle analysis in C5 fibroblasts. **(C):** Representative flow cytometry pattern; **(D):** The histogram displays the percentage changes of G0-G1, S and G2-M when cells are transfected with miR-376a-3p, miR-376b-3p or miR-control (Mann-Whitney test, one-tailed, n=3). **E:** hsa-miR-376a-3p and miR-376a-3p MUT, hsa-miR-376b-3p and miR-376b-3p MUT sequences; the seed sequence is in blue and the differences between the miRNA and the mutant form are in red. Data are represented as mean +/- SEM. (\*p<0.05, \*\*p<0.01, \*\*\*p<0.001 and \*\*\*\*p<0.0001).

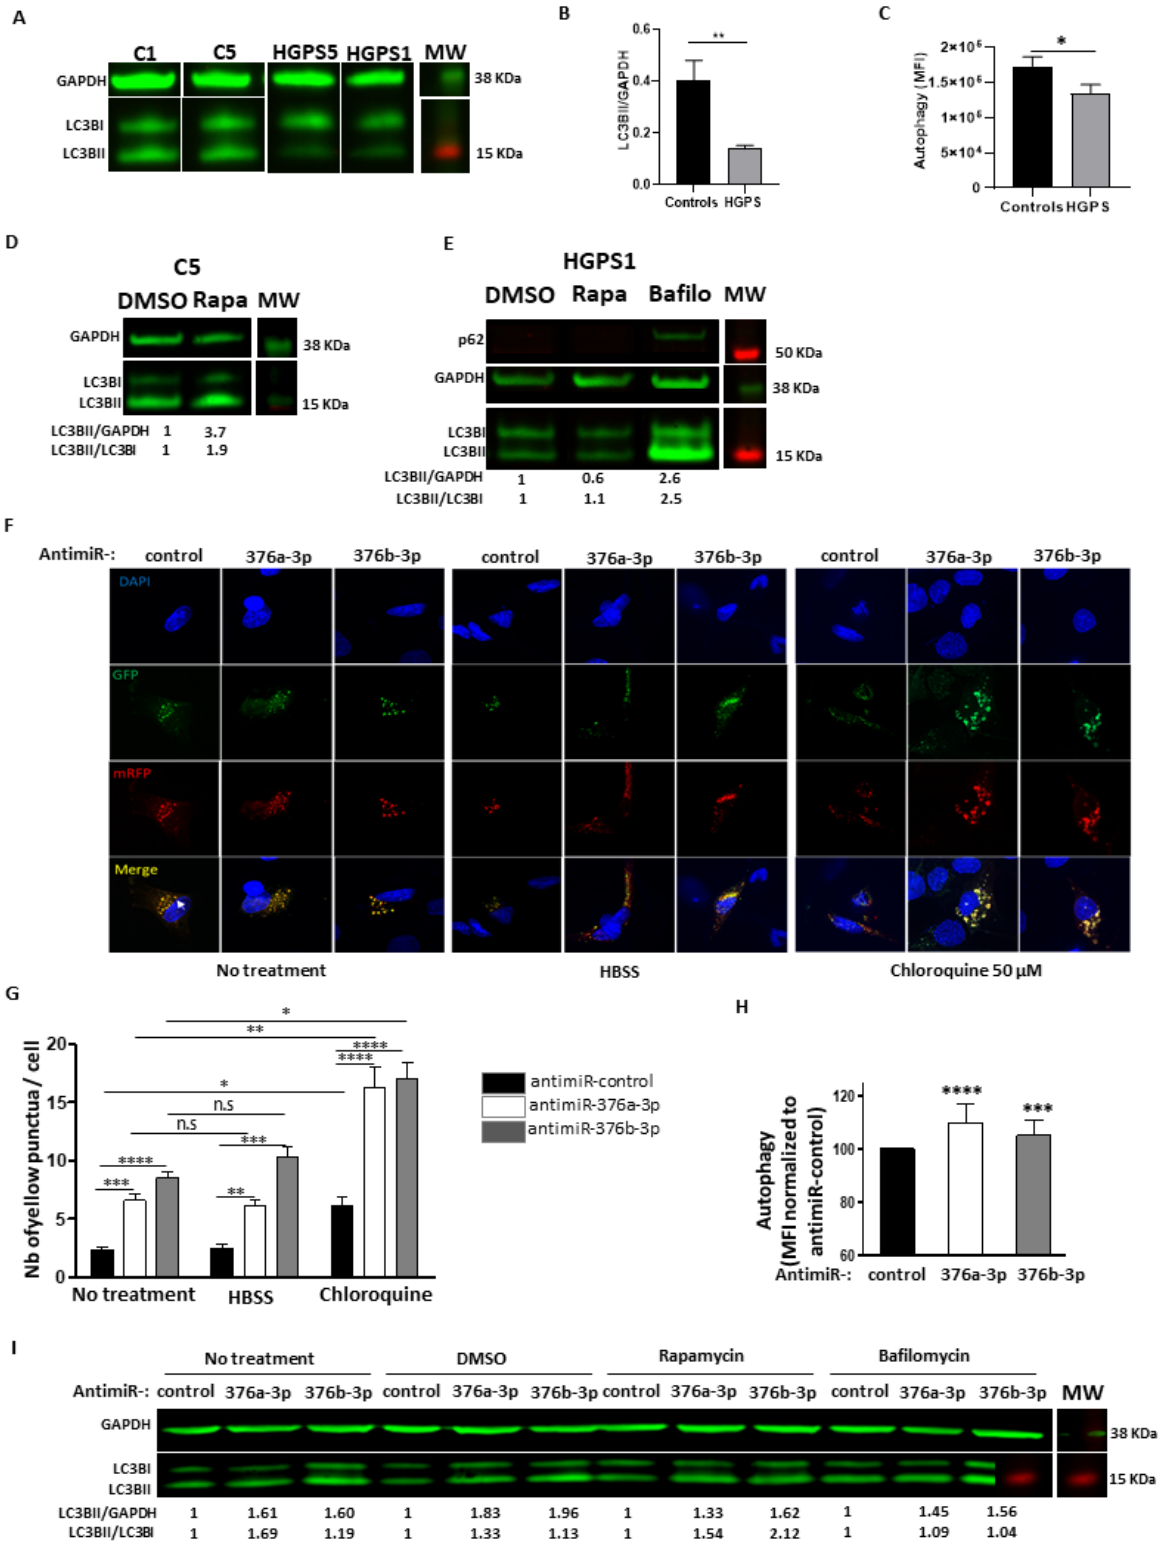



**Figure S4 related to figure 4: Monitoring of basal autophagy in control and HGPS fibroblasts and role of miR-376a-3p or miR-376b-3p in autophagy.**

**A and B:** Western blot analysis on fibroblast whole cell lysates. Immunodetection and quantification of LC3BI, LC3BII and GAPDH (on 5 controls and 4 HGPS fibroblasts, unpaired t-test). **C:** Basal autophagy level, represented by the mean fluorescence intensity (MFI), performed by flow cytometry (on 3 controls and 3 HGPS fibroblasts, unpaired t-test) (MW: molecular weight). **D:** Representative immunodetection of LC3BII, LC3BI, p62 and GAPDH in HGPS1 fibroblasts treated with DMSO, rapamycin (Rapa, 1 $\mu$ M) or bafilomycin (Bafilo, 100nM) for 24h. This experiment has been reproduced on HGPS2, HGPS5, HGPS6 (MW: molecular weight). **E:** Representative immunodetection of LC3BII, LC3BI and GAPDH in C5 fibroblasts treated with DMSO or rapamycin (Rapa, 1 $\mu$ M) for 24h (MW: molecular weight). **F and G:** HGPS6 fibroblasts transiently transfected with antimiRNAs and ptfLC3 plasmid and analyzed with fluorescence microscope (obj x63); **(F)** Representative images. **(G)** The histogram shows autophagosomes quantification (n = 3, ANOVA test) **H:** MFI normalized to antimiR-control after transfection of antimiR-376a-3p or antimiR-376b-3p (n=5, on 3 HGPS fibroblasts, unpaired t-test). **I:** Western blot analysis on fibroblast whole cell lysates. Immunodetection of LC3BI, LC3BII and GAPDH in HGPS6 fibroblasts, not treated, treated with DMSO or rapamycin (1 $\mu$ M) or bafilomycin (100nM). Each condition has been transfected with antimiR-control or antimiR-376a-3p or antimiR-376b-3p (MW: molecular weight). Data are represented as mean +/- SEM. (\*p<0.05, \*\*p<0.01, \*\*\*p<0.001 and \*\*\*\*p<0.0001).

|                                  | Patients  |           |           |              |             |           | Controls (wild-type) |                |                      |                     |                |
|----------------------------------|-----------|-----------|-----------|--------------|-------------|-----------|----------------------|----------------|----------------------|---------------------|----------------|
| Source                           | Coriell   | CRB TAC   | CRB TAC   | Coriell      | Coriell     | CRB TAC   | CRB TAC              | Coriell        | Coriell              | Coriell             | Coriell        |
| ID                               | AG 11513  | 13-5968   | 13-13622  | AG 01972     | AG 11498    | 13-8243   | 13-13090             | AG 07095       | AG 08471             | GM 08398            | AG 08498       |
| Corresponding name               | HGPS1     | HGPS2     | HGPS3     | HGPS4        | HGPS5       | HGPS6     | C1                   | C2             | C3                   | C4                  | C5             |
| Passage tested for miRNome study | P13       | P11 P20   | P11 P20   | P14 P21      | P11         | /         | P11 P19              | P11            | P14                  | P10                 | P12 P20        |
| Age (year)                       | 8         | 2 months  | 8 months  | 14           | 14          | 2         | 7                    | 2              | NA                   | 8                   | 1              |
| Sexe                             | female    | female    | male      | female       | male        | female    | male                 | male           | male                 | male                | male           |
| Fibroblasts source               | skin, leg | skin, arm | skin, arm | skin, thorax | skin, thigh | skin, arm | skin, arm            | skin, foreskin | skin, thorax abdomen | skin, inguinal area | skin, foreskin |

**Table S1 related to STAR methods:** Identification and source of fibroblasts. All HGPS patients carry the p.Gly608Gly mutation in *LMNA* (heterozygous NM\_170707.4:c.1824C>T). NA: not available.

| <b>miR</b>        | <b>Forward (F)/Reverse (R)</b> | <b>Sequence</b>        |
|-------------------|--------------------------------|------------------------|
| <b>miR-300</b>    | F                              | CTCTCACCATGCAGATCCCA   |
|                   | R                              | GGAGTCAGCCTTGTTCCTCAA  |
| <b>miR-376a1</b>  | F                              | TCGTCTGCCTCATGTGACTT   |
|                   | R                              | TGTGTCTGTCCGTCCTGTAC   |
| <b>miR-376a2</b>  | F                              | GCTGCTTTGAAAACCTCGGA   |
|                   | R                              | ATTATGTGTGCACCAAGGGC   |
| <b>miR-376b</b>   | F                              | TTTGTCCCTTCCAGAGCCCA   |
|                   | R                              | GCCCTACGGTCTCTTCCAG    |
| <b>miR-376c</b>   | F                              | TGCTTAGGTTTCATGCTTCCAG |
|                   | R                              | ACCGACTTTCCACTTACCCT   |
| <b>miR-654</b>    | F                              | CAAATGCTGCCTTGGGATCA   |
|                   | R                              | GACAACACACCACAGCCTG    |
| <b>miR-1185-1</b> | F                              | CAGAGAGAGTTGGCCCATGA   |
|                   | R                              | CTCCTGGTGAACACTGGCTA   |
| <b>miR-1185-2</b> | F                              | AGATGAGGCTTGTACCCGG    |
|                   | R                              | ACGCAAATGAGAGTCTCCCC   |

**Table S2 related to STAR methods:** List of primers used for ChiP-ddPCR.
